# Supplementary material
Source: PubMed Central journal article supplement (PMC4917420)
Supplement: NIHMS775859-supplement-Supplemental_Digital_Content.pdf [file NIHMS775859-supplement-Supplemental_Digital_Content.pdf]

## Appendix 1. The International Classification of Diseases, 9th Revision, Diagnoses Codes Used to Define Outcome Variables, Consortium on Safe Labor 2002-2008

| Definition in current study        | Collected ICD-9 codes | Definition                                                                                                                                            |
|------------------------------------|-----------------------|-------------------------------------------------------------------------------------------------------------------------------------------------------|
| <b>Obstetric complications</b>     |                       |                                                                                                                                                       |
| Gestational diabetes               | 648.8                 | Other current conditions in the mothers classifiable elsewhere but complicating pregnancy, childbirth, or the puerperium – Abnormal glucose tolerance |
| Gestational hypertension           | 642.3                 | Transient hypertension of pregnancy                                                                                                                   |
| Preeclampsia                       | 642.4                 | Mild or unspecified pre-eclampsia                                                                                                                     |
|                                    | 642.5                 | Severe pre-eclampsia                                                                                                                                  |
| Eclampsia                          | 642.6                 | Eclampsia                                                                                                                                             |
| Placental abruption                | 641.2                 | Premature separation of placenta                                                                                                                      |
| Placenta previa                    | 641.0                 | Placenta previa without hemorrhage                                                                                                                    |
|                                    | 641.1                 | Hemorrhage from placenta previa                                                                                                                       |
| Hemorrhage                         | 666-666.3             | Postpartum hemorrhage                                                                                                                                 |
| Fever                              | 672                   | Pyrexia of unknown origin during puerperium                                                                                                           |
| Major puerperal infection          | 670.02- 670.04        | Major puerperal infection                                                                                                                             |
|                                    | 995.91- 995.92        | Sepsis                                                                                                                                                |
| Complication of surgical wound     | 674.1                 | Disruption of cesarean wound                                                                                                                          |
|                                    | 674.2                 | Disruption of perineal wound                                                                                                                          |
|                                    | 674.3                 | Other complications of obstetric surgical wounds                                                                                                      |
| Infection of genitourinary tract   | 646.6                 | Infection of genitourinary tract in pregnancy                                                                                                         |
| <b>Acute cardiovascular events</b> |                       |                                                                                                                                                       |
| Ischemic heart disease             | 410                   | Acute myocardial infarction                                                                                                                           |
|                                    | 411                   | Other acute and subacute forms of ischemic heart disease                                                                                              |
|                                    | 413                   | Angina pectoris                                                                                                                                       |
| Stroke                             | 429.7                 | Certain sequela of myocardial infarction, not elsewhere classified                                                                                    |
|                                    | 430                   | Subarachnoid hemorrhage                                                                                                                               |
|                                    | 431                   | Intracerebral hemorrhage                                                                                                                              |
|                                    | 432                   | Other and unspecified intracranial hemorrhage                                                                                                         |
|                                    | 433                   | Occlusion and stenosis of precerebral arteries                                                                                                        |
|                                    | 434                   | Occlusion of cerebral arteries                                                                                                                        |
|                                    | 435                   | Transient cerebral ischemia                                                                                                                           |
|                                    | 436                   | Acute, but ill-defined cerebrovascular disease                                                                                                        |
|                                    | 674                   | Cerebrovascular disorder in the puerperium                                                                                                            |
|                                    | 668.2                 | Complications of the administration of anesthetic or other sedation in labor and delivery                                                             |
| Heart failure                      | 997.09                | Complications affecting specified body systems, not elsewhere classified – Other nervous system complications                                         |
|                                    | 428                   | Heart failure                                                                                                                                         |
| Cardiac arrest/failure             | 427.5                 | Cardiac arrest                                                                                                                                        |
|                                    | 668.1                 | Complications of the administration of anesthetic or other sedation in labor and delivery cardiac complications                                       |
|                                    | 669.4                 | Other complications of obstetrical surgery and procedures                                                                                             |

Kim SS, Zhu Y, Grantz KL, Hinkle SN, Chen Z, Wallace ME, et al. Obstetric and neonatal risks among obese women without chronic disease. *Obstet Gynecol* 2016; 128.

The authors provided this information as a supplement to their article.

|                                      |                                   |                                                                                                                                                                    |
|--------------------------------------|-----------------------------------|--------------------------------------------------------------------------------------------------------------------------------------------------------------------|
|                                      | 997.1                             | Complications affecting specified body systems, not elsewhere classified cardiac complications                                                                     |
| Unspecified event                    | 648.62, 648.64                    | Other cardiovascular diseases with postpartum complication                                                                                                         |
| <b>Neonatal complications</b>        |                                   |                                                                                                                                                                    |
| Birth injury                         | 767                               | Birth trauma                                                                                                                                                       |
| Congenital anomalies                 | 740-759                           | Congenital anomalies                                                                                                                                               |
| Respiratory distress syndrome        | 769                               | Respiratory distress syndrome                                                                                                                                      |
| Intracerebral hemorrhage             | 767.0<br>772.2                    | Subdural and cerebral hemorrhage<br>Subarachnoid hemorrhage                                                                                                        |
| Seizure                              | 779.0<br>780.32<br>780.39         | Convulsion in the newborn<br>Complex febrile convulsions<br>Other convulsions                                                                                      |
| Prei- or intraventricular hemorrhage | 772.10-772.14                     | Intraventricular hemorrhage of fetus or newborn                                                                                                                    |
| Necrotizing enterocolitis            | 777.5                             | Necrotizing enterocolitis in newborn                                                                                                                               |
| Transient tachypnea                  | 770.6                             | Transient tachypnea of newborn                                                                                                                                     |
| Sepsis                               | 771.81<br>038<br>995.91<br>995.92 | Septicemia [sepsis] of newborn<br>Septicemia<br>Sepsis<br>Severe sepsis                                                                                            |
| Apnea                                | 770.81<br>770.82<br>786.03        | Primary apnea of newborn<br>Other apnea of newborn<br>Apnea                                                                                                        |
| Asphyxia                             | 768.5<br>768.6<br>768.9           | Severe birth asphyxia<br>Mild or moderate birth asphyxia<br>Unspecified asphyxia in live born infant                                                               |
| Aspiration                           | 770.1<br>770.85<br>770.86         | Fetal and newborn aspiration<br>Aspiration of postnatal stomach contents without respiratory symptoms<br>Aspiration of postnatal stomach with respiratory symptoms |
| Retinopathy of prematurity           | 362.21                            | Retinopathy of prematurity                                                                                                                                         |

Kim SS, Zhu Y, Grantz KL, Hinkle SN, Chen Z, Wallace ME, et al. Obstetric and neonatal risks among obese women without chronic disease. *Obstet Gynecol* 2016; 128.

The authors provided this information as a supplement to their article.

## Appendix 2. Source of the Study Analytic Sample

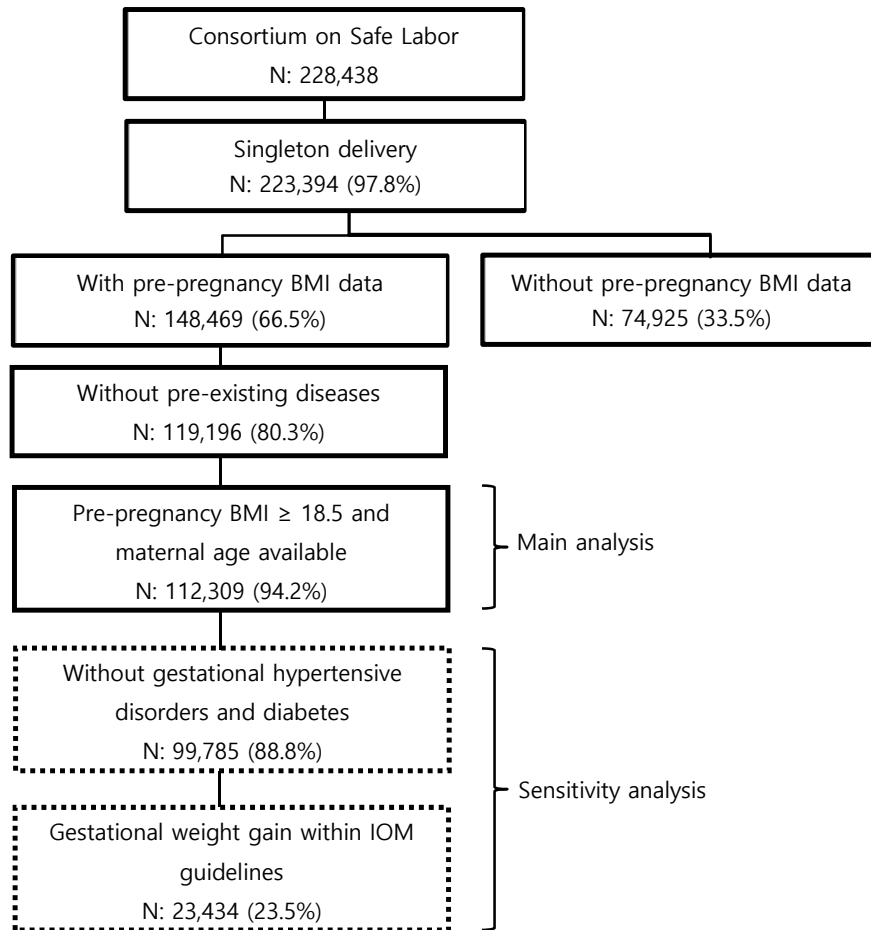

Kim SS, Zhu Y, Grantz KL, Hinkle SN, Chen Z, Wallace ME, et al. Obstetric and neonatal risks among obese women without chronic disease. *Obstet Gynecol* 2016; 128.

The authors provided this information as a supplement to their article.

### Appendix 3. The International Classification of Diseases, 9th Revision, Diagnoses Codes Used to Define Pre-existing Chronic Diseases, Consortium on Safe Labor 2002-2008

| Definition in current study | Collected ICD-9 codes                                       | Definition                                                                                                                           |
|-----------------------------|-------------------------------------------------------------|--------------------------------------------------------------------------------------------------------------------------------------|
| Hypertension                | 401-405.9                                                   | Hypertensive disease                                                                                                                 |
|                             | 642.0                                                       | Benign essential hypertension complicating pregnancy, childbirth, and puerperium                                                     |
|                             | 642.1                                                       | Hypertension secondary to renal disease complicating pregnancy childbirth and puerperium                                             |
|                             | 642.2                                                       | Other preexisting hypertension complicating pregnancy, childbirth, and puerperium                                                    |
|                             | 642.7                                                       | Pre-eclampsia or eclampsia superimposed on pre-existing hypertension                                                                 |
| Diabetes                    | 250-250.9                                                   | Diabetes mellitus                                                                                                                    |
|                             | 648.0                                                       | Other current conditions in mothers classifiable elsewhere but complicating pregnancy, childbirth, or puerperium- diabetes mellitus  |
| Heart disease               | 393                                                         | Chronic rheumatic pericarditis                                                                                                       |
|                             | 394                                                         | Diseases of the mitral valve                                                                                                         |
|                             | 395                                                         | Diseases of the aortic valve                                                                                                         |
|                             | 396                                                         | Diseases of the mitral and aortic valve                                                                                              |
|                             | 397                                                         | Diseases of other endocardial structures                                                                                             |
|                             | 398                                                         | Other rheumatic heart disease                                                                                                        |
|                             | 412                                                         | Old myocardial infarction                                                                                                            |
|                             | 414                                                         | Other forms of chronic ischemic heart disease                                                                                        |
|                             | 423                                                         | Other diseases of pericardium                                                                                                        |
|                             | 424                                                         | Other diseases of endocardium                                                                                                        |
|                             | 425                                                         | Cardiomyopathy                                                                                                                       |
|                             | 426                                                         | Conduction disorders                                                                                                                 |
|                             | 427                                                         | Cardiac dysrhythmias                                                                                                                 |
|                             | (exclude 427.5)                                             |                                                                                                                                      |
| 429                         | Ill-defined descriptions and complications of heart disease |                                                                                                                                      |
| Asthma                      | 493-493.9                                                   | Asthma                                                                                                                               |
| Thyroid diseases            | 193                                                         | Malignant neoplasm of thyroid gland                                                                                                  |
|                             | 226                                                         | Benign neoplasm of thyroid glands                                                                                                    |
|                             | 240-246.9                                                   | Disorders of thyroid gland                                                                                                           |
|                             | 648.1                                                       | Other current conditions in mothers classifiable elsewhere but complicating pregnancy, childbirth, or puerperium-thyroid dysfunction |
| Gastrointestinal diseases   | 555-558.9                                                   | Noninfectious enteritis and colitis                                                                                                  |
| Renal diseases              | 585-585.9                                                   | Chronic kidney disease                                                                                                               |
|                             | 586                                                         | Renal failure, unspecified                                                                                                           |
|                             | 588-588.9                                                   | Disorders resulting from impaired renal function                                                                                     |
|                             | 646.2                                                       | Unspecified renal disease in pregnancy, without mention of hypertension                                                              |
| Depression                  | 296.2-296.3                                                 | Major depressive disorder                                                                                                            |
|                             | 311                                                         | Depressive disorder, not elsewhere classified                                                                                        |
| Epilepsy                    | 345-345.9                                                   | Epilepsy and recurrent seizures                                                                                                      |
|                             | 649.4                                                       | Epilepsy complicating pregnancy, childbirth, or the puerperium                                                                       |
| Hyperlipidemia              | 272-272.9                                                   | Disorders of lipid metabolism                                                                                                        |
| HIV                         | 042                                                         | HIV disease                                                                                                                          |

Kim SS, Zhu Y, Grantz KL, Hinkle SN, Chen Z, Wallace ME, et al. Obstetric and neonatal risks among obese women without chronic disease. *Obstet Gynecol* 2016; 128.

The authors provided this information as a supplement to their article.

|        |                                       |
|--------|---------------------------------------|
| 079.53 | HIV, type 2                           |
| 795.71 | Nonspecific serologic evidence of HIV |
| V08    | Asymptotic HIV infection status       |

---

Kim SS, Zhu Y, Grantz KL, Hinkle SN, Chen Z, Wallace ME, et al. Obstetric and neonatal risks among obese women without chronic disease. *Obstet Gynecol* 2016; 128.

The authors provided this information as a supplement to their article.

#### Appendix 4. Number of Pregnancies From the Same Woman by Outcome During the Study Period of Consortium on Safe Labor 2002-2008

| Outcomes                                     | No of events | No of women contributed multiple events |
|----------------------------------------------|--------------|-----------------------------------------|
| <b><i>Obstetric outcome</i></b>              |              |                                         |
| Gestational hypertensive disorders           | 7,888        | 120                                     |
| Gestational Diabetes                         | 5,257        | 112                                     |
| Placental previa                             | 750          | 14                                      |
| Cesarean delivery                            | 29,657       | 966                                     |
| Prelabor cesarean delivery                   | 10,782       | 239                                     |
| Intrapartum cesarean deliver                 | 18,875       | 371                                     |
| Cesarean delivery among induction            | 8,055        | 14                                      |
| Cesarean delivery among spontaneous labors   | 10,820       | 243                                     |
| Operative vaginal delivery                   | 6,200        | 24                                      |
| Induction                                    | 41,049       | 858                                     |
| Oxytocin augmentation                        | 31,021       | 622                                     |
| Abruption                                    | 1,623        | 19                                      |
| 3 <sup>rd</sup> , 4 <sup>th</sup> laceration | 2,213        | 8                                       |
| Hemorrhage                                   | 8,054        | 224                                     |
| Blood transfusion                            | 3,536        | 145                                     |
| Maternal fever                               | 2,101        | 16                                      |
| Major puerperal infection                    | 513          | 2                                       |
| Infection of genitourinary tract             | 161          | 0                                       |
| Complication of surgical wounds              | 379          | 2                                       |
| Hysterectomy                                 | 67           | 0                                       |
| Acute cardiovascular events                  | 252          | 2                                       |
| Maternal ICU admission                       | 529          | 5                                       |
| <b><i>Neonatal outcome</i></b>               |              |                                         |
| Preterm birth < 37 weeks                     | 10,488       | 171                                     |
| Early preterm birth < 32 weeks               | 1,865        | 14                                      |
| Late preterm birth 32-<37 weeks              |              |                                         |

Kim SS, Zhu Y, Grantz KL, Hinkle SN, Chen Z, Wallace ME, et al. Obstetric and neonatal risks among obese women without chronic disease. *Obstet Gynecol* 2016; 128.

The authors provided this information as a supplement to their article.

|                               |        |     |
|-------------------------------|--------|-----|
| Stillbirth                    | 379    | 2   |
| Large for Gestational Age     | 11,277 | 184 |
| Birth Injury                  | 2,006  | 3   |
| Congenital anomaly            | 6,866  | 28  |
| Transient tachypnea           | 3,434  | 9   |
| Apnea                         | 1,617  | 3   |
| Aspiration                    | 582    | 1   |
| Asphyxia                      | 288    | 0   |
| Sepsis                        | 2,673  | 8   |
| Seizure                       | 203    | 0   |
| Intracranial hemorrhage       | 250    | 0   |
| NICU admission                | 11,122 | 100 |
| Respiratory distress syndrome | 2,229  | 12  |
| Necrotizing enterocolitis     | 163    | 0   |
| PVH-IVH hemorrhage            | 416    | 0   |
| Retinopathy of prematurity    | 298    | 0   |

The total numbers of deliveries are in the footnote of Appendix 6 and 7.

Kim SS, Zhu Y, Grantz KL, Hinkle SN, Chen Z, Wallace ME, et al. Obstetric and neonatal risks among obese women without chronic disease. *Obstet Gynecol* 2016; 128.

The authors provided this information as a supplement to their article.

**Appendix 5. Demographic Characteristics of Singleton Pregnancies Among Low-Risk Women Without Gestational Hypertensive Disorders and Gestational Diabetes by Prepregnancy Obesity, Consortium on Safe Labor 2002-2008**

| Characteristics           | Normal BMI<br>(n=61,402,<br>61.5%) | Overweight<br>(n=22,927,<br>23.0%) | Obese I<br>(n= 9,512,<br>9.5%) | Obese II<br>(n=3,720,<br>3.7%) | Obese III<br>(n=2,224,<br>2.2%) | P value* |
|---------------------------|------------------------------------|------------------------------------|--------------------------------|--------------------------------|---------------------------------|----------|
| Age (years), Mean (±SD)   | 27.4 (±6.1)                        | 27.6 (±5.9)                        | 27.6 (±5.8)                    | 27.5 (±5.6)                    | 27.5 (±5.5)                     | < 0.001  |
| Race/ethnicity, n (%)     |                                    |                                    |                                |                                |                                 | < 0.001  |
| White                     | 34,840 (56.7)                      | 10,542 (46.0)                      | 4,055 (42.6)                   | 1,592 (42.8)                   | 834 (37.5)                      |          |
| Black                     | 8,999 (14.7)                       | 5,007 (21.8)                       | 2,586 (27.2)                   | 1,216 (32.7)                   | 910 (40.9)                      |          |
| Hispanic                  | 11,222 (18.3)                      | 5,506 (24.0)                       | 2,171 (22.8)                   | 677 (18.2)                     | 338 (15.2)                      |          |
| Asian/Pacific Islanders   | 2,838 (4.6)                        | 540 (2.4)                          | 184 (1.9)                      | 68 (1.8)                       | 33 (1.5)                        |          |
| Multi-race/Others/Unknown | 3,503 (5.7)                        | 1,332 (5.8)                        | 516 (5.4)                      | 167 (4.5)                      | 109 (4.9)                       |          |
| Marital status, n (%)     |                                    |                                    |                                |                                |                                 | 0.01     |
| Married                   | 41,555 (67.7)                      | 13,958 (60.9)                      | 5,395 (56.7)                   | 2,010 (54.0)                   | 1,046 (47.0)                    |          |
| Unmarried                 | 18,925 (30.8)                      | 8,534 (37.2)                       | 3,928 (41.3)                   | 1,623 (43.6)                   | 1,120 (50.4)                    |          |
| Unknown                   | 922 (1.5)                          | 435 (1.9)                          | 189 (2.0)                      | 87 (2.3)                       | 58 (2.6)                        |          |
| Insurance, n (%)          |                                    |                                    |                                |                                |                                 | < 0.001  |
| Private                   | 33,965 (55.3)                      | 11,540 (50.3)                      | 4,599 (48.4)                   | 1,852 (49.8)                   | 1,010 (45.4)                    |          |
| Public/Self pay           | 16,546 (27.0)                      | 8,127 (35.5)                       | 3,854 (40.5)                   | 1,535 (41.3)                   | 1,060 (47.7)                    |          |
| Others/Unknown            | 10,891 (17.7)                      | 3,260 (14.2)                       | 1,059 (11.1)                   | 33 (9.0)                       | 154 (6.9)                       |          |
| Parity, n (%)             |                                    |                                    |                                |                                |                                 | < 0.001  |
| Nulliparous               | 27,004 (44.0)                      | 7,870 (34.3)                       | 2,745 (28.9)                   | 1,043 (28.0)                   | 631 (28.4)                      |          |
| Smoking, n (%)            | 3,161 (5.2)                        | 1,407 (6.1)                        | 688 (7.2)                      | 297 (8.0)                      | 191 (8.6)                       | < 0.001  |
| Alcohol use, n (%)        | 1,021 (1.7)                        | 347 (1.5)                          | 150 (1.6)                      | 58 (1.6)                       | 33 (1.5)                        | 0.04     |

More than one delivery was contributed by 2, 652 normal BMI women (4.3%), 743 overweight women (3.2%), 274 obese women (2.9%), 76 obese class II women (2.0%), and 71 obese class III women (3.2%). To adjust for clustering, models included robust standard errors from generalized estimating equations.

\* P values are based on generalized estimating equations and adjusted for study site.

Kim SS, Zhu Y, Grantz KL, Hinkle SN, Chen Z, Wallace ME, et al. Obstetric and neonatal risks among obese women without chronic disease. *Obstet Gynecol* 2016; 128.

The authors provided this information as a supplement to their article.



**Appendix 6. Obstetric Complications of Singleton Pregnancies Among Low-Risk Women Without Gestational Hypertensive Disorders and Gestational Diabetes By Prepregnancy Obesity, Consortium on Safe Labor 2002-2008**

| Outcomes                                         | Events |      | RR (95% CI)       | P for trend* |
|--------------------------------------------------|--------|------|-------------------|--------------|
|                                                  | n      | (%)  |                   |              |
| <b>Placenta previa</b>                           |        |      |                   | 0.08         |
| Normal BMI                                       | 415    | 0.7  | Reference         |              |
| Overweight                                       | 157    | 0.7  | 0.94 (0.78, 1.13) |              |
| Obese I                                          | 75     | 0.8  | 1.04 (0.81, 1.34) |              |
| Obese II                                         | 13     | 0.4  | 0.48 (0.28, 0.83) |              |
| Obese III                                        | 14     | 0.6  | 0.76 (0.43, 1.34) |              |
| <b>Cesarean delivery</b>                         |        |      |                   | < 0.001      |
| Normal BMI                                       | 13,239 | 21.6 | Reference         |              |
| Overweight                                       | 6,245  | 27.2 | 1.25 (1.22, 1.28) |              |
| Obese I                                          | 3,019  | 31.7 | 1.46 (1.41, 1.50) |              |
| Obese II                                         | 1,345  | 36.2 | 1.69 (1.62, 1.76) |              |
| Obese III                                        | 971    | 43.7 | 1.97 (1.88, 2.07) |              |
| <b>Prelabor cesarean delivery</b>                |        |      |                   | < 0.001      |
| Normal BMI                                       | 4,827  | 7.9  | Reference         |              |
| Overweight                                       | 2,249  | 9.8  | 1.14 (1.08, 1.19) |              |
| Obese I                                          | 1,166  | 12.3 | 1.35 (1.28, 1.43) |              |
| Obese II                                         | 553    | 14.9 | 1.68 (1.56, 1.82) |              |
| Obese III                                        | 416    | 18.7 | 2.03 (1.86, 2.21) |              |
| <b>Intrapartum cesarean delivery</b>             |        |      |                   | < 0.001      |
| Normal BMI                                       | 8,412  | 14.9 | Reference         |              |
| Overweight                                       | 3,996  | 19.3 | 1.32 (1.28, 1.37) |              |
| Obese I                                          | 1,853  | 22.2 | 1.57 (1.50, 1.64) |              |
| Obese II                                         | 792    | 25.0 | 1.80 (1.70, 1.92) |              |
| Obese III                                        | 555    | 30.7 | 2.12 (1.98, 2.27) |              |
| <b>Cesarean delivery among induction</b>         |        |      |                   | < 0.001      |
| Normal BMI                                       | 3,359  | 15.9 | Reference         |              |
| Overweight                                       | 1,609  | 19.8 | 1.30 (1.24, 1.36) |              |
| Obese I                                          | 719    | 22.1 | 1.53 (1.43, 1.63) |              |
| Obese II                                         | 305    | 24.0 | 1.69 (1.53, 1.86) |              |
| Obese III                                        | 237    | 30.6 | 1.94 (1.75, 2.15) |              |
| <b>Cesarean delivery among spontaneous labor</b> |        |      |                   | < 0.001      |
| Normal BMI                                       | 5,053  | 14.3 | Reference         |              |
| Overweight                                       | 2,087  | 19.0 | 1.34 (1.28, 1.40) |              |
| Obese I                                          | 1,134  | 22.3 | 1.58 (1.49, 1.67) |              |
| Obese II                                         | 487    | 25.7 | 1.86 (1.72, 2.01) |              |
| Obese III                                        | 318    | 30.8 | 2.14 (1.95, 2.35) |              |
| <b>Operational vaginal delivery</b>              |        |      |                   | 0.04         |
| Normal BMI                                       | 3,894  | 8.5  | Reference         |              |
| Overweight                                       | 1,093  | 7.1  | 0.99 (0.93, 1.06) |              |
| Obese I                                          | 362    | 6.3  | 0.97 (0.88, 1.08) |              |
| Obese II                                         | 102    | 4.9  | 0.78 (0.65, 0.94) |              |

Kim SS, Zhu Y, Grantz KL, Hinkle SN, Chen Z, Wallace ME, et al. Obstetric and neonatal risks among obese women without chronic disease. *Obstet Gynecol* 2016; 128.

The authors provided this information as a supplement to their article.

|                                                  |        |      |                   |         |
|--------------------------------------------------|--------|------|-------------------|---------|
| Obese III                                        | 60     | 5.7  | 0.90 (0.70, 1.14) |         |
| <b>Induction</b>                                 |        |      |                   | < 0.001 |
| Normal BMI                                       | 21,151 | 37.4 | Reference         |         |
| Overweight                                       | 8,129  | 39.3 | 1.12 (1.10, 1.14) |         |
| Obese I                                          | 3,260  | 39.1 | 1.16 (1.12, 1.19) |         |
| Obese II                                         | 1,272  | 40.2 | 1.21 (1.16, 1.26) |         |
| Obese III                                        | 774    | 42.8 | 1.32 (1.25, 1.39) |         |
| <b>Oxytocin augmentation</b>                     |        |      |                   | < 0.001 |
| Normal BMI                                       | 17,842 | 50.4 | Reference         |         |
| Overweight                                       | 6,480  | 51.6 | 1.05 (1.03, 1.07) |         |
| Obese I                                          | 2,599  | 51.1 | 1.06 (1.03, 1.09) |         |
| Obese II                                         | 948    | 50.0 | 1.05 (1.01, 1.09) |         |
| Obese III                                        | 537    | 51.9 | 1.10 (1.04, 1.16) |         |
| <b>Abruption</b>                                 |        |      |                   | 0.05    |
| Normal BMI                                       | 844    | 1.4  | Reference         |         |
| Overweight                                       | 318    | 1.4  | 0.92 (0.81, 1.05) |         |
| Obese I                                          | 144    | 1.5  | 0.89 (0.75, 1.07) |         |
| Obese II                                         | 53     | 1.4  | 0.82 (0.62, 1.07) |         |
| Obese III                                        | 37     | 1.7  | 0.86 (0.62, 1.19) |         |
| <b>3<sup>rd</sup>, 4<sup>th</sup> laceration</b> |        |      |                   | < 0.001 |
| Normal BMI                                       | 1,439  | 3.3  | Reference         |         |
| Overweight                                       | 364    | 2.4  | 0.90 (0.80, 1.00) |         |
| Obese I                                          | 103    | 1.7  | 0.75 (0.62, 0.92) |         |
| Obese II                                         | 34     | 1.5  | 0.69 (0.49, 0.96) |         |
| Obese III                                        | 16     | 1.4  | 0.62 (0.38, 1.03) |         |
| <b>Hemorrhage</b>                                |        |      |                   | 0.28    |
| Normal BMI                                       | 4,196  | 6.8  | Reference         |         |
| Overweight                                       | 1,616  | 7.1  | 1.02 (0.97, 1.08) |         |
| Obese I                                          | 693    | 7.3  | 1.03 (0.95, 1.11) |         |
| Obese II                                         | 293    | 7.9  | 1.09 (0.97, 1.22) |         |
| Obese III                                        | 162    | 7.3  | 0.98 (0.84, 1.14) |         |
| <b>Blood transfusion</b>                         |        |      |                   | 0.74    |
| Normal BMI                                       | 2,047  | 5.0  | Reference         |         |
| Overweight                                       | 679    | 4.8  | 0.99 (0.91, 1.08) |         |
| Obese I                                          | 275    | 4.8  | 1.02 (0.91, 1.16) |         |
| Obese II                                         | 110    | 5.0  | 1.07 (0.89, 1.29) |         |
| Obese III                                        | 52     | 4.1  | 0.96 (0.74, 1.25) |         |
| <b>Maternal fever</b>                            |        |      |                   | < 0.001 |
| Normal BMI                                       | 997    | 1.6  | Reference         |         |
| Overweight                                       | 448    | 2.0  | 1.18 (1.05, 1.31) |         |
| Obese I                                          | 177    | 1.9  | 1.10 (0.94, 1.29) |         |
| Obese II                                         | 90     | 2.4  | 1.38 (1.11, 1.71) |         |
| Obese III                                        | 60     | 2.7  | 1.43 (1.10, 1.86) |         |
| <b>Major puerperal infection</b>                 |        |      |                   | < 0.001 |
| Normal BMI                                       | 213    | 0.4  | Reference         |         |
| Overweight                                       | 100    | 0.4  | 1.24 (0.98, 1.58) |         |
| Obese I                                          | 41     | 0.4  | 1.23 (0.88, 1.73) |         |
| Obese II                                         | 33     | 0.9  | 2.51 (1.72, 3.67) |         |

Kim SS, Zhu Y, Grantz KL, Hinkle SN, Chen Z, Wallace ME, et al. Obstetric and neonatal risks among obese women without chronic disease. *Obstet Gynecol* 2016; 128.

The authors provided this information as a supplement to their article.

|                                         |     |      |                    |      |
|-----------------------------------------|-----|------|--------------------|------|
| Obese III                               | 8   | 0.4  | 0.99 (0.49, 2.00)  |      |
| <b>Infection of genitourinary tract</b> |     |      |                    | 0.19 |
| Normal BMI                              | 60  | 0.1  | Reference          |      |
| Overweight                              | 36  | 0.2  | 1.45 (0.94, 2.23)  |      |
| Obese I                                 | 16  | 0.2  | 1.43 (0.80, 2.56)  |      |
| Obese II                                | 6   | 0.2  | 1.30 (0.55, 3.08)  |      |
| Obese III                               | 4   | 0.2  | 1.33 (0.46, 3.80)  |      |
| <b>Complication of surgical wounds</b>  |     |      |                    | 0.31 |
| Normal BMI                              | 191 | 0.3  | Reference          |      |
| Overweight                              | 69  | 0.3  | 1.05 (0.79, 1.38)  |      |
| Obese I                                 | 27  | 0.3  | 1.02 (0.67, 1.54)  |      |
| Obese II                                | 11  | 0.3  | 1.05 (0.57, 1.93)  |      |
| Obese III                               | 10  | 0.5  | 1.68 (0.87, 3.24)  |      |
| <b>Hysterectomy</b>                     |     |      |                    | -    |
| Normal BMI                              | 38  | 0.07 | Failed to converge |      |
| Overweight                              | 10  | 0.05 |                    |      |
| Obese I                                 | 9   | 0.12 |                    |      |
| Obese II                                | 1   | 0.03 |                    |      |
| Obese III                               | 3   | 0.17 |                    |      |
| <b>Maternal ICU admission</b>           |     |      |                    | 0.74 |
| Normal BMI                              | 229 | 0.4  | Reference          |      |
| Overweight                              | 91  | 0.5  | 1.06 (0.83, 1.35)  |      |
| Obese I                                 | 34  | 0.4  | 1.04 (0.73, 1.50)  |      |
| Obese II                                | 9   | 0.3  | 0.96 (0.49, 1.85)  |      |
| Obese III                               | 6   | 0.3  | 1.11 (0.49, 2.51)  |      |
| <b>Acute cardiovascular events</b>      |     |      |                    | 0.08 |
| Normal BMI                              | 108 | 0.2  | Reference          |      |
| Overweight                              | 51  | 0.2  | 1.20 (0.85, 1.70)  |      |
| Obese I                                 | 23  | 0.2  | 1.30 (0.82, 2.07)  |      |
| Obese II                                | 9   | 0.2  | 1.33 (0.67, 2.60)  |      |
| Obese III                               | 7   | 0.3  | 1.63 (0.74, 3.60)  |      |

Relative risks (RR) were adjusted for maternal age, maternal race, insurance type, marital status, parity, smoking and alcohol use during pregnancy and study site.

\* Test of linear trend was conducted by using the median BMI value for each obesity group and fitting this as a continuous variable in the logistic regression models.

Gestational hypertensive disorders included gestational hypertension, preeclampsia, and eclampsia and acute cardiovascular events included ischemic heart disease, heart failure, cardiac arrest/failure, and unspecified cardiovascular postpartum complications.

Specific outcomes were analyzed among respective deliveries at risk and sites which did not report specific outcomes were excluded from respective analysis: Intrapartum cesarean delivery and induction among spontaneous or induced labor (n=90,574), cesarean delivery among induction (n=34,586), cesarean delivery among spontaneous labors (n=55,988), operative vaginal delivery among vaginal deliveries (n=69,959), oxytocin augmentation among spontaneous labors (n=55,918), 3rd, 4th laceration was analyzed among vaginal deliveries (n=68,257), blood transfusion among 64,495 deliveries, hysterectomy among 84,729 deliveries, maternal ICU admission among 84,631 deliveries.

Kim SS, Zhu Y, Grantz KL, Hinkle SN, Chen Z, Wallace ME, et al. Obstetric and neonatal risks among obese women without chronic disease. *Obstet Gynecol* 2016; 128.

The authors provided this information as a supplement to their article.

**Appendix 7. Neonatal Complications of Singleton Pregnancies Among Low-Risk Women Without Gestational Hypertensive Disorders and Gestational Diabetes by Prepregnancy Obesity, Consortium on Safe Labor 2002-2008**

| Outcomes                                  | Events |      | Fully adjusted RR (95% CI) | P for trend * |
|-------------------------------------------|--------|------|----------------------------|---------------|
|                                           | N      | (%)  |                            |               |
| <b>Preterm birth &lt; 37 week</b>         |        |      |                            | <0.001        |
| Normal BMI                                | 4,991  | 8.1  | Reference                  |               |
| Overweight                                | 1,856  | 8.1  | 0.93 (0.88, 0.98)          |               |
| Obese I                                   | 795    | 8.4  | 0.91 (0.85, 0.98)          |               |
| Obese II                                  | 281    | 7.6  | 0.81 (0.72, 0.91)          |               |
| Obese III                                 | 186    | 8.4  | 0.84 (0.73, 0.97)          |               |
| <b>Early preterm birth &lt; 32 week</b>   |        |      |                            | 0.09          |
| Normal BMI                                | 779    | 1.3  | Reference                  |               |
| Overweight                                | 344    | 1.5  | 1.06 (0.93, 1.20)          |               |
| Obese I                                   | 161    | 1.7  | 1.13 (0.95, 1.34)          |               |
| Obese II                                  | 64     | 1.7  | 1.12 (0.87, 1.46)          |               |
| Obese III                                 | 44     | 2.0  | 1.17 (0.86, 1.59)          |               |
| <b>Late preterm birth 32-&lt; 37 week</b> |        |      |                            | < 0.001       |
| Normal BMI                                | 4,212  | 7.0  | Reference                  |               |
| Overweight                                | 1,512  | 6.7  | 0.90 (0.85, 0.96)          |               |
| Obese I                                   | 634    | 6.8  | 0.87 (0.80, 0.95)          |               |
| Obese II                                  | 217    | 5.9  | 0.75 (0.66, 0.86)          |               |
| Obese III                                 | 142    | 6.5  | 0.76 (0.66, 0.92)          |               |
| <b>Stillbirth</b>                         |        |      |                            | 0.06          |
| Normal BMI                                | 191    | 0.3  | Reference                  |               |
| Overweight                                | 79     | 0.3  | 1.06 (0.82, 1.39)          |               |
| Obese I                                   | 45     | 0.5  | 1.47 (1.05, 2.07)          |               |
| Obese II                                  | 13     | 0.4  | 1.14 (0.64, 2.02)          |               |
| Obese III                                 | 10     | 0.5  | 1.41 (0.74, 2.69)          |               |
| <b>Large for Gestational Age</b>          |        |      |                            | < 0.001       |
| Normal BMI                                | 4,863  | 7.9  | Reference                  |               |
| Overweight                                | 2,703  | 11.8 | 1.50 (1.44, 1.57)          |               |
| Obese I                                   | 1,245  | 13.1 | 1.70 (1.60, 1.80)          |               |
| Obese II                                  | 504    | 13.6 | 1.80 (1.65, 1.96)          |               |
| Obese III                                 | 327    | 14.7 | 2.04 (1.83, 2.26)          |               |
| <b>Birth Injury</b>                       |        |      |                            | 0.002         |
| Normal BMI                                | 1,062  | 1.7  | Reference                  |               |
| Overweight                                | 400    | 1.7  | 1.14 (1.01, 1.27)          |               |
| Obese I                                   | 162    | 1.7  | 1.19 (1.01, 1.40)          |               |
| Obese II                                  | 69     | 1.9  | 1.29 (1.02, 1.64)          |               |
| Obese III                                 | 39     | 1.8  | 1.22 (0.89, 1.68)          |               |
| <b>Congenital anomaly</b>                 |        |      |                            | 0.07          |
| Normal BMI                                | 3,553  | 5.8  | Reference                  |               |
| Overweight                                | 1,384  | 6.0  | 1.05 (0.99, 1.12)          |               |
| Obese I                                   | 587    | 6.2  | 1.08 (0.99, 1.18)          |               |
| Obese II                                  | 215    | 5.8  | 1.00 (0.87, 1.14)          |               |
| Obese III                                 | 144    | 6.5  | 1.10 (0.94, 1.30)          |               |

Kim SS, Zhu Y, Grantz KL, Hinkle SN, Chen Z, Wallace ME, et al. Obstetric and neonatal risks among obese women without chronic disease. *Obstet Gynecol* 2016; 128.

The authors provided this information as a supplement to their article.

|                                      |       |      |                   |         |
|--------------------------------------|-------|------|-------------------|---------|
| <b>Transient tachypnea</b>           |       |      |                   | < 0.001 |
| Normal BMI                           | 1,598 | 2.6  | Reference         |         |
| Overweight                           | 730   | 3.2  | 1.17 (1.07, 1.28) |         |
| Obese I                              | 327   | 3.4  | 1.21 (1.07, 1.36) |         |
| Obese II                             | 140   | 3.8  | 1.28 (1.08, 1.52) |         |
| Obese III                            | 107   | 4.8  | 1.52 (1.26, 1.85) |         |
| <b>Apnea</b>                         |       |      |                   | 0.10    |
| Normal BMI                           | 713   | 1.2  | Reference         |         |
| Overweight                           | 324   | 1.5  | 1.11 (0.97, 1.26) |         |
| Obese I                              | 127   | 1.4  | 0.98 (0.81, 1.19) |         |
| Obese II                             | 38    | 1.1  | 0.73 (0.53, 1.01) |         |
| Obese III                            | 25    | 1.2  | 0.74 (0.50, 1.10) |         |
| <b>Aspiration</b>                    |       |      |                   | < 0.001 |
| Normal BMI                           | 264   | 0.4  | Reference         |         |
| Overweight                           | 126   | 0.6  | 1.28 (1.03, 1.58) |         |
| Obese I                              | 66    | 0.7  | 1.62 (1.23, 2.13) |         |
| Obese II                             | 20    | 0.5  | 1.21 (0.77, 1.91) |         |
| Obese III                            | 22    | 1.0  | 2.09 (1.34, 2.34) |         |
| <b>Asphyxia</b>                      |       |      |                   | 0.83    |
| Normal BMI                           | 152   | 0.3  | Reference         |         |
| Overweight                           | 60    | 0.3  | 1.04 (0.77, 1.41) |         |
| Obese I                              | 19    | 0.2  | 0.79 (0.48, 1.28) |         |
| Obese II                             | 13    | 0.4  | 1.39 (0.78, 2.49) |         |
| Obese III                            | 6     | 0.3  | 1.03 (0.46, 2.33) |         |
| <b>Respiratory distress syndrome</b> |       |      |                   | 0.005   |
| Normal BMI                           | 962   | 19.3 | Reference         |         |
| Overweight                           | 385   | 20.7 | 1.09 (0.98, 1.21) |         |
| Obese I                              | 169   | 21.3 | 1.08 (0.93, 1.25) |         |
| Obese II                             | 72    | 25.6 | 1.32 (1.07, 1.62) |         |
| Obese III                            | 46    | 24.7 | 1.23 (0.95, 1.59) |         |
| <b>Sepsis</b>                        |       |      |                   | < 0.001 |
| Normal BMI                           | 1,185 | 1.9  | Reference         |         |
| Overweight                           | 553   | 2.4  | 1.18 (1.06, 1.30) |         |
| Obese I                              | 252   | 2.7  | 1.24 (1.08, 1.43) |         |
| Obese II                             | 96    | 2.6  | 1.20 (0.98, 1.48) |         |
| Obese III                            | 74    | 3.3  | 1.42 (1.12, 1.79) |         |
| <b>Necrotizing enterocolitis</b>     |       |      |                   | 0.27    |
| Normal BMI                           | 75    | 1.5  | Reference         |         |
| Overweight                           | 29    | 1.6  | 1.08 (0.70, 1.67) |         |
| Obese I                              | 8     | 1.0  | 0.69 (0.33, 1.44) |         |
| Obese II                             | 9     | 3.2  | 2.22 (1.11, 4.42) |         |
| Obese III                            | 4     | 2.2  | 1.50 (0.56, 4.04) |         |
| <b>Seizure</b>                       |       |      |                   | 0.26    |
| Normal BMI                           | 100   | 0.2  | Reference         |         |
| Overweight                           | 39    | 0.2  | 1.04 (0.71, 1.52) |         |
| Obese I                              | 22    | 0.2  | 1.39 (0.86, 2.25) |         |
| Obese II                             | 11    | 0.3  | 1.72 (0.91, 3.26) |         |
| Obese III                            | 3     | 0.1  | 0.73 (0.23, 2.35) |         |

Kim SS, Zhu Y, Grantz KL, Hinkle SN, Chen Z, Wallace ME, et al. Obstetric and neonatal risks among obese women without chronic disease. *Obstet Gynecol* 2016; 128.

The authors provided this information as a supplement to their article.

|                                   |       |      |                   |         |
|-----------------------------------|-------|------|-------------------|---------|
| <b>Intracranial hemorrhage</b>    |       |      |                   | 0.65    |
| Normal BMI                        | 112   | 0.2  | Reference         |         |
| Overweight                        | 56    | 0.2  | 1.22 (0.88, 1.69) |         |
| Obese I                           | 27    | 0.3  | 1.37 (0.89, 2.09) |         |
| Obese II                          | 8     | 0.2  | 1.07 (0.52, 2.21) |         |
| Obese III                         | 3     | 0.1  | 0.60 (0.19, 1.89) |         |
| <b>PVH-IVH hemorrhage</b>         |       |      |                   | 0.003   |
| Normal BMI                        | 168   | 3.4  | Reference         |         |
| Overweight                        | 85    | 4.6  | 1.37 (1.06, 1.78) |         |
| Obese I                           | 39    | 4.9  | 1.56 (1.11, 2.20) |         |
| Obese II                          | 14    | 5.0  | 1.58 (0.93, 2.70) |         |
| Obese III                         | 8     | 4.3  | 1.31 (0.65, 2.64) |         |
| <b>Retinopathy of prematurity</b> |       |      |                   | 0.006   |
| Normal BMI                        | 123   | 2.5  | Reference         |         |
| Overweight                        | 66    | 3.6  | 1.40 (1.04, 1.89) |         |
| Obese I                           | 23    | 2.9  | 1.23 (0.79, 1.90) |         |
| Obese II                          | 14    | 5.0  | 2.01 (1.18, 3.41) |         |
| Obese III                         | 8     | 4.3  | 1.58 (0.79, 3.17) |         |
| <b>NICU admission</b>             |       |      |                   | < 0.001 |
| Normal BMI                        | 5,097 | 8.3  | Reference         |         |
| Overweight                        | 2,248 | 9.8  | 1.12 (1.07, 1.18) |         |
| Obese I                           | 932   | 9.8  | 1.08 (1.01, 1.15) |         |
| Obese II                          | 390   | 10.5 | 1.13 (1.02, 1.24) |         |
| Obese III                         | 277   | 12.5 | 1.25 (1.12, 1.40) |         |

Relative risks (RR) were adjusted for maternal age, maternal race, insurance type, marital status, parity, smoking and alcohol use during pregnancy, and study site.

\*Test of linear trend was conducted by using the median BMI value for each obesity group and fitting this as a continuous variable in the logistic regression models.

Respiratory distress syndrome, necrotizing enterocolitis, PVH-IVH hemorrhage and retinopathy prematurity were analyzed among preterm births before 37 weeks of gestation (n=8,109). Late preterm birth was analyzed among 98,393 deliveries and apnea was analyzed among 94,054 deliveries.

Kim SS, Zhu Y, Grantz KL, Hinkle SN, Chen Z, Wallace ME, et al. Obstetric and neonatal risks among obese women without chronic disease. *Obstet Gynecol* 2016; 128.

The authors provided this information as a supplement to their article.
